# Supplementary material for: Group-12 metal complexes with isomeric 1-(diphenylphosphino)-1′-[N-(pyridylmethyl)carbamoyl]ferrocenes: coordination polymers vs. finite multinuclear coordination assemblies
Source: Royal Society of Chemistry journal article supplement (doi:10.1039/b719334c), 2008-01-01
Supplement: b719334c.pdf [file b719334c.pdf]

## Supporting Information

### Group-12 metal complexes with isomeric 1-(diphenylphosphino)-1'-[*N*-(pyridylmethyl)-carbamoyl]ferrocenes: coordination polymers vs. finite multinuclear coordination assemblies

Janett Kühnert, Ivana Císařová, Martin Lamač, and Petr Štěpnička \*

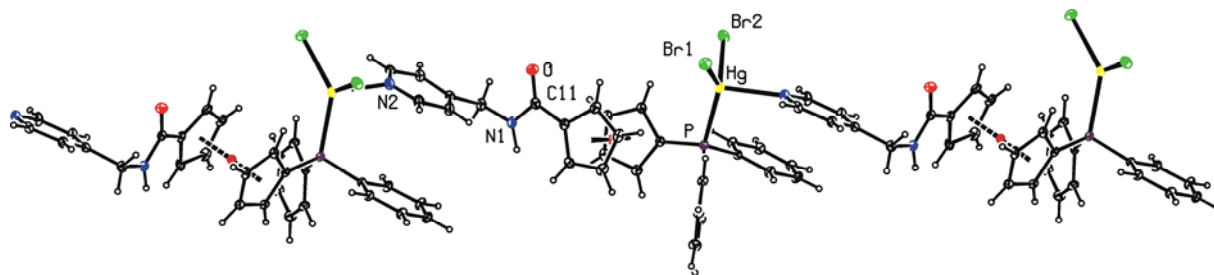

**Figure S1.** PLATON plot of the infinite linear polymeric chain in complex **5**. Displacement ellipsoids enclose 30% probability level.
